# Supplementary material
Source: PubMed Central journal article supplement (PMC6585404)
Supplement: NIHMS1026500-supplement-1.pdf [file NIHMS1026500-supplement-1.pdf]

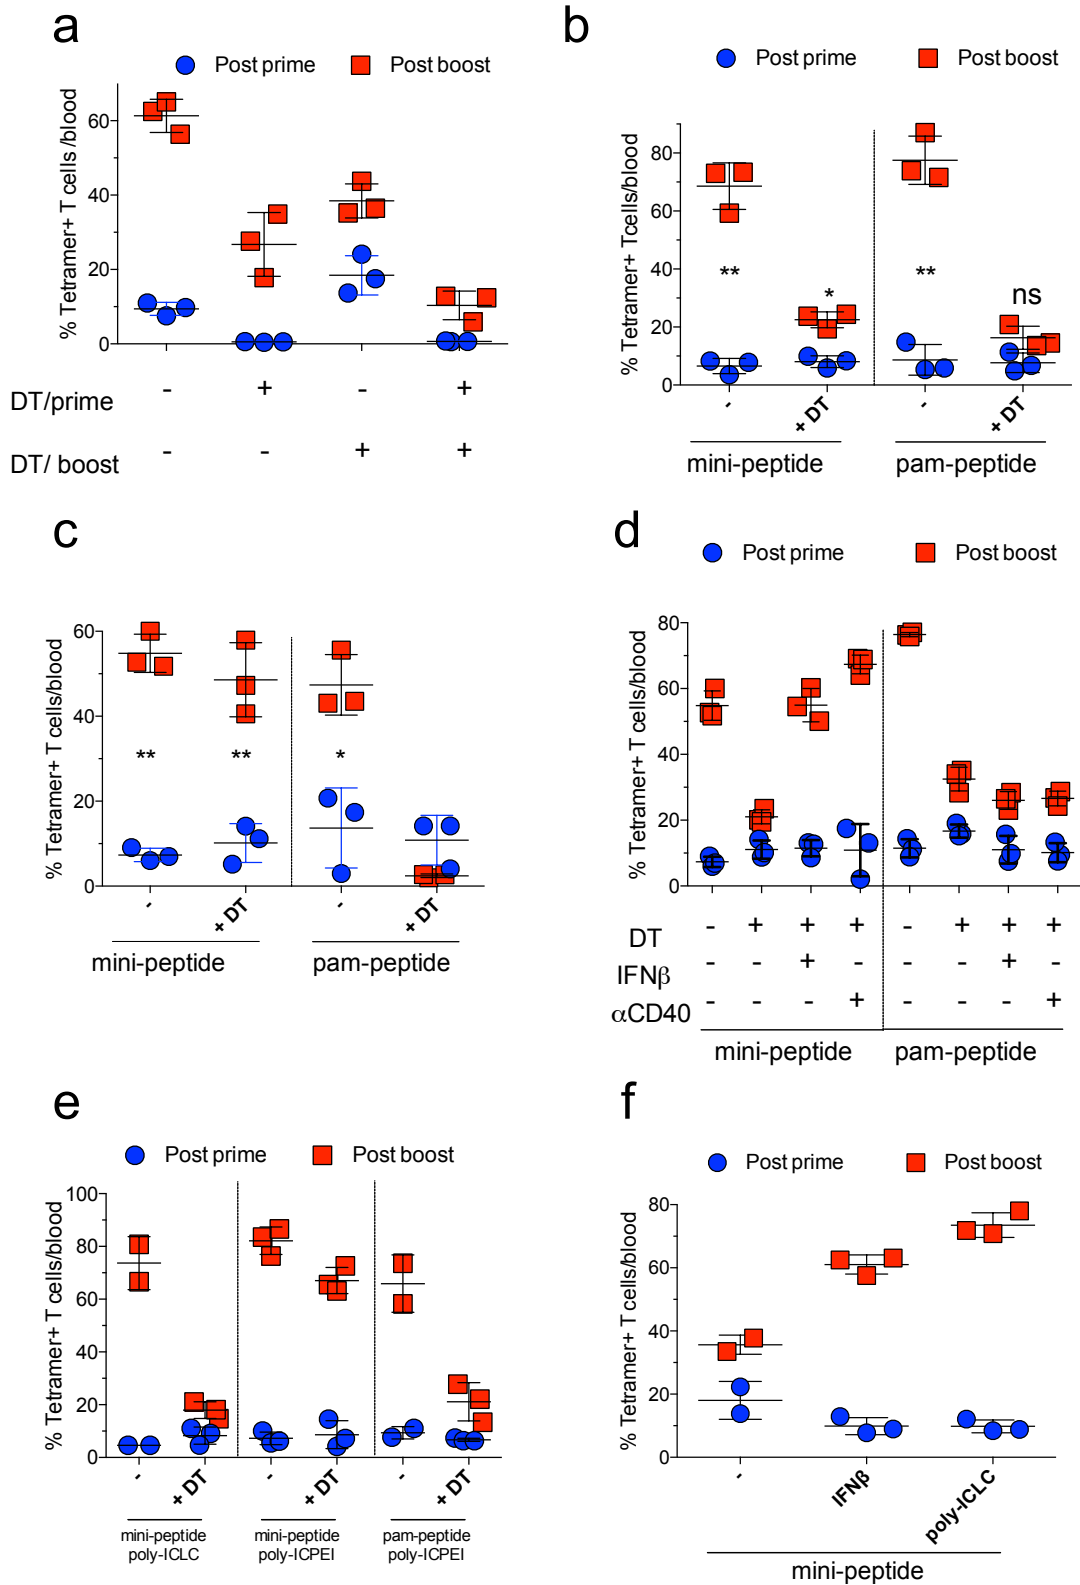

**Supplemental Fig. 1: Role of DCs for T cell expansion induced by peptide vaccination.** **a-f** Percentages of tetramer+ T cells (OT-I cells) among the total CD8 population in blood 7 days after the prime and the boost of the experiments in **Fig. 1** (shown following the same order). Results are presented as individual mice (each symbol) with the mean  $\pm$  SD for each group.

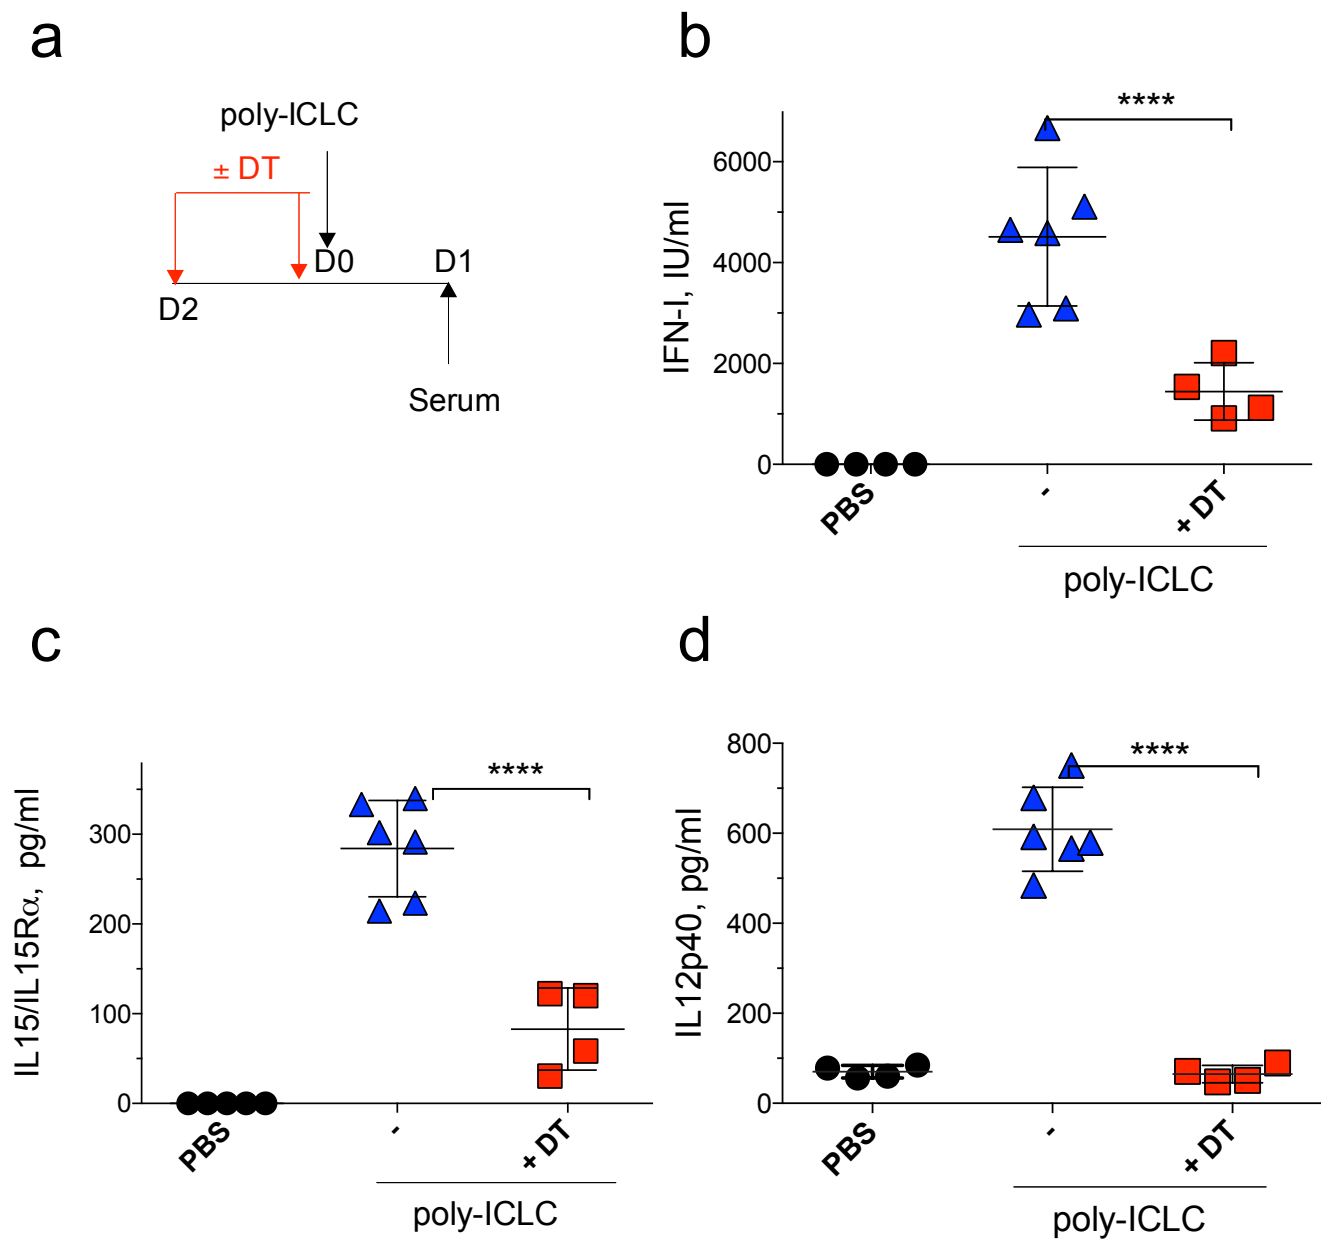

**Supplemental Fig. 2: DC depletion diminishes cytokine production by poly-ICLC.**

**a**, CD11cDTR BM chimeric mice were treated or not with diphtheria toxin (DT) and were injected with 50  $\mu$ g poly-ICLC (i.v.) **b-d**, 18 h later the levels of IFN-I, soluble IL15/IL15R $\alpha$  complexes and IL12p40 were measured in serum. Results are presented as individual mice (each symbol) with the mean  $\pm$  SD for each group.

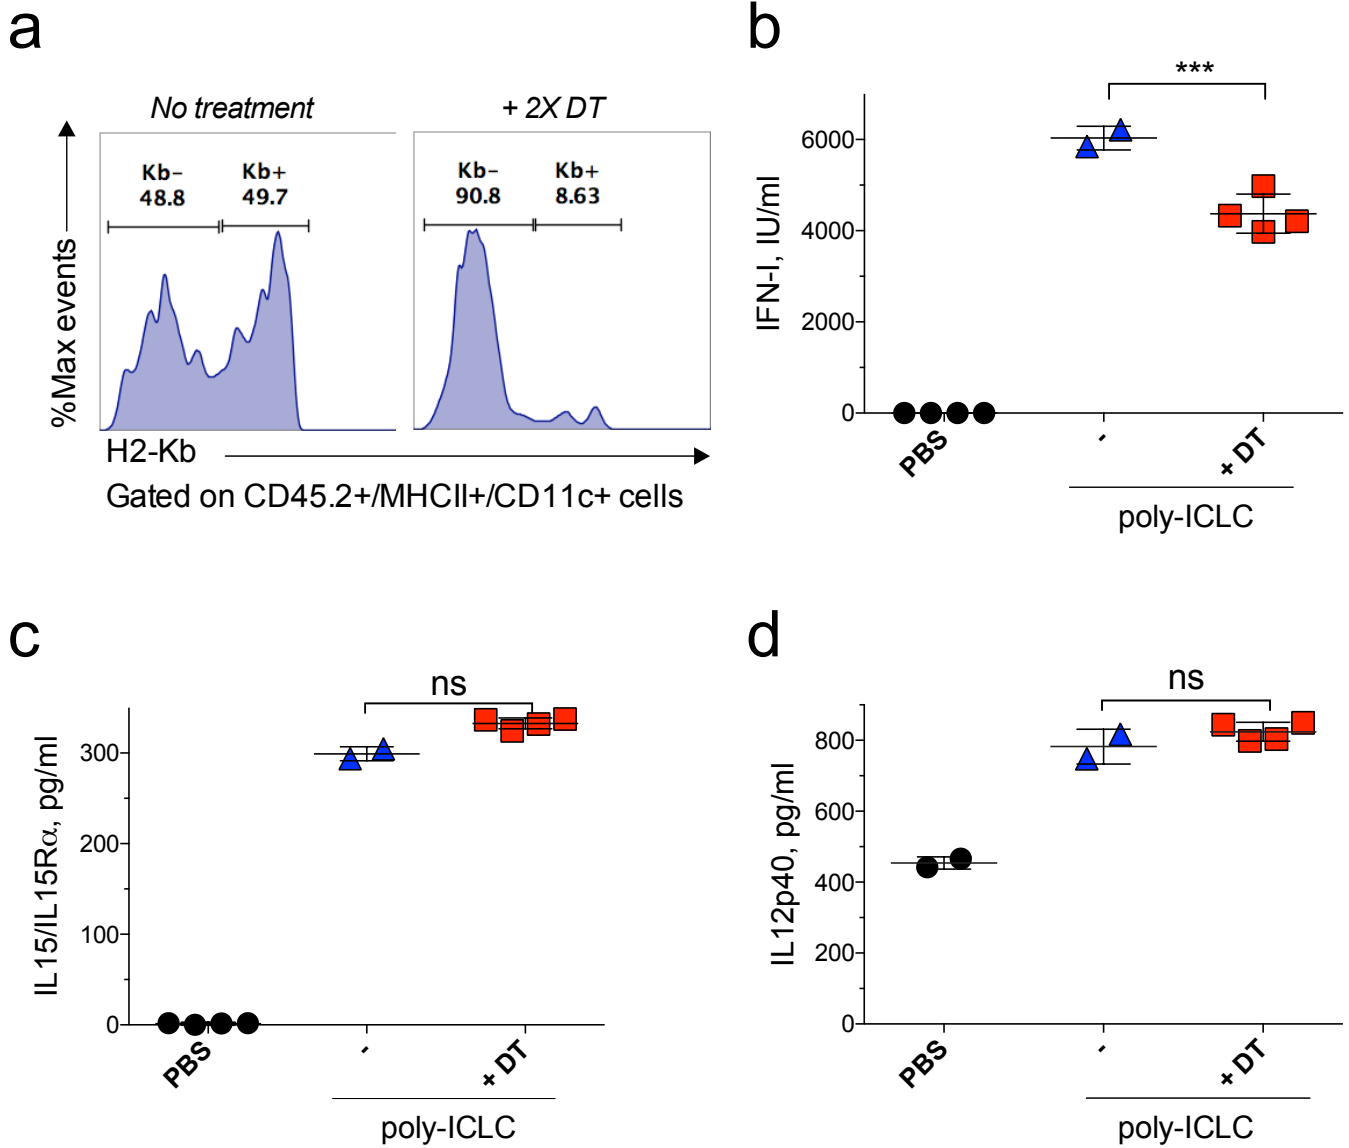

**Supplemental Fig. 3: Cytokine production by DCs from mixed BM**

**(CD11cDTR+ $\beta$ 2M-KO) chimeras.** **a**, Flow cytometry analysis showing efficient depletion of MHC-I+ CD11c+ spleen cells in double BM chimeras after 2 DT doses (right panel). **b-d**, Mixed BM reconstituted mice were stimulated as described in Supplemental Fig. 2a and 18 h later the levels of IFN-I, IL15/IL15R $\alpha$  complexes and IL12p40 were measured in serum. Results are presented as individual mice (each symbol) with the mean  $\pm$  SD for each group.

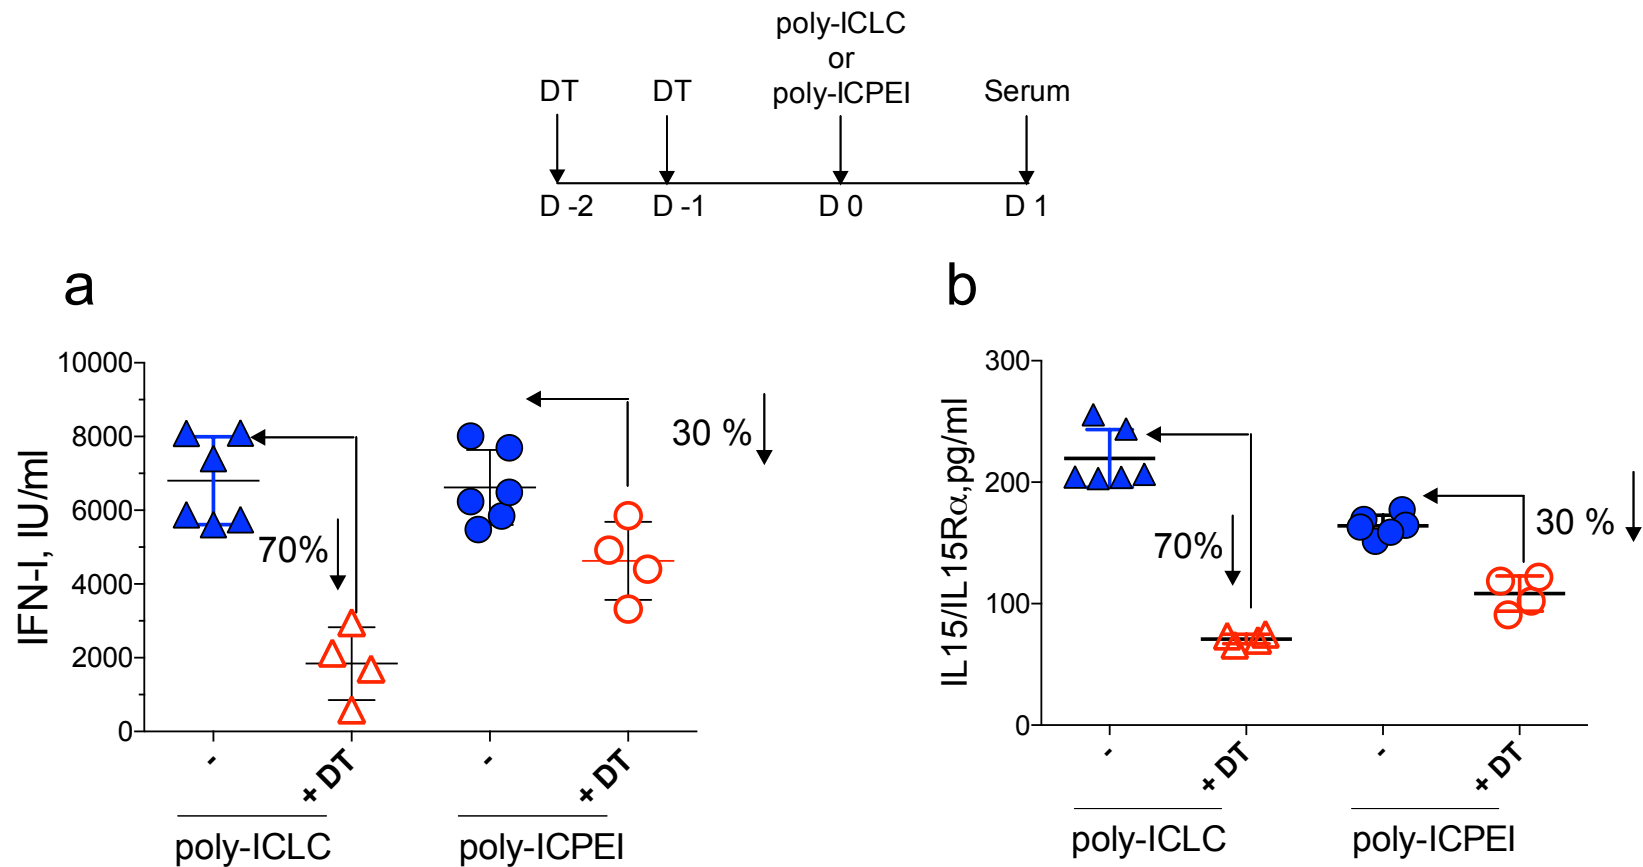

**Supplemental Fig. 4: Poly-ICPEI induces IFN-I production in the absence of DCs.**

**a-b**, DC (CD11c<sup>+</sup> cells)-depleted mice (+DT) or control (-DT) mice were injected with 50  $\mu$ g poly-ICLC or 50  $\mu$ g poly-ICPEI and 18 h later IFN-I and IL15/IL15R $\alpha$  complexes levels were measured in serum. Results are presented for individual mice (each symbol) with the mean  $\pm$  SD for each group. Percentages denote the reduction of IFN-I and IL15/IL15R $\alpha$  induced by DC depletion.

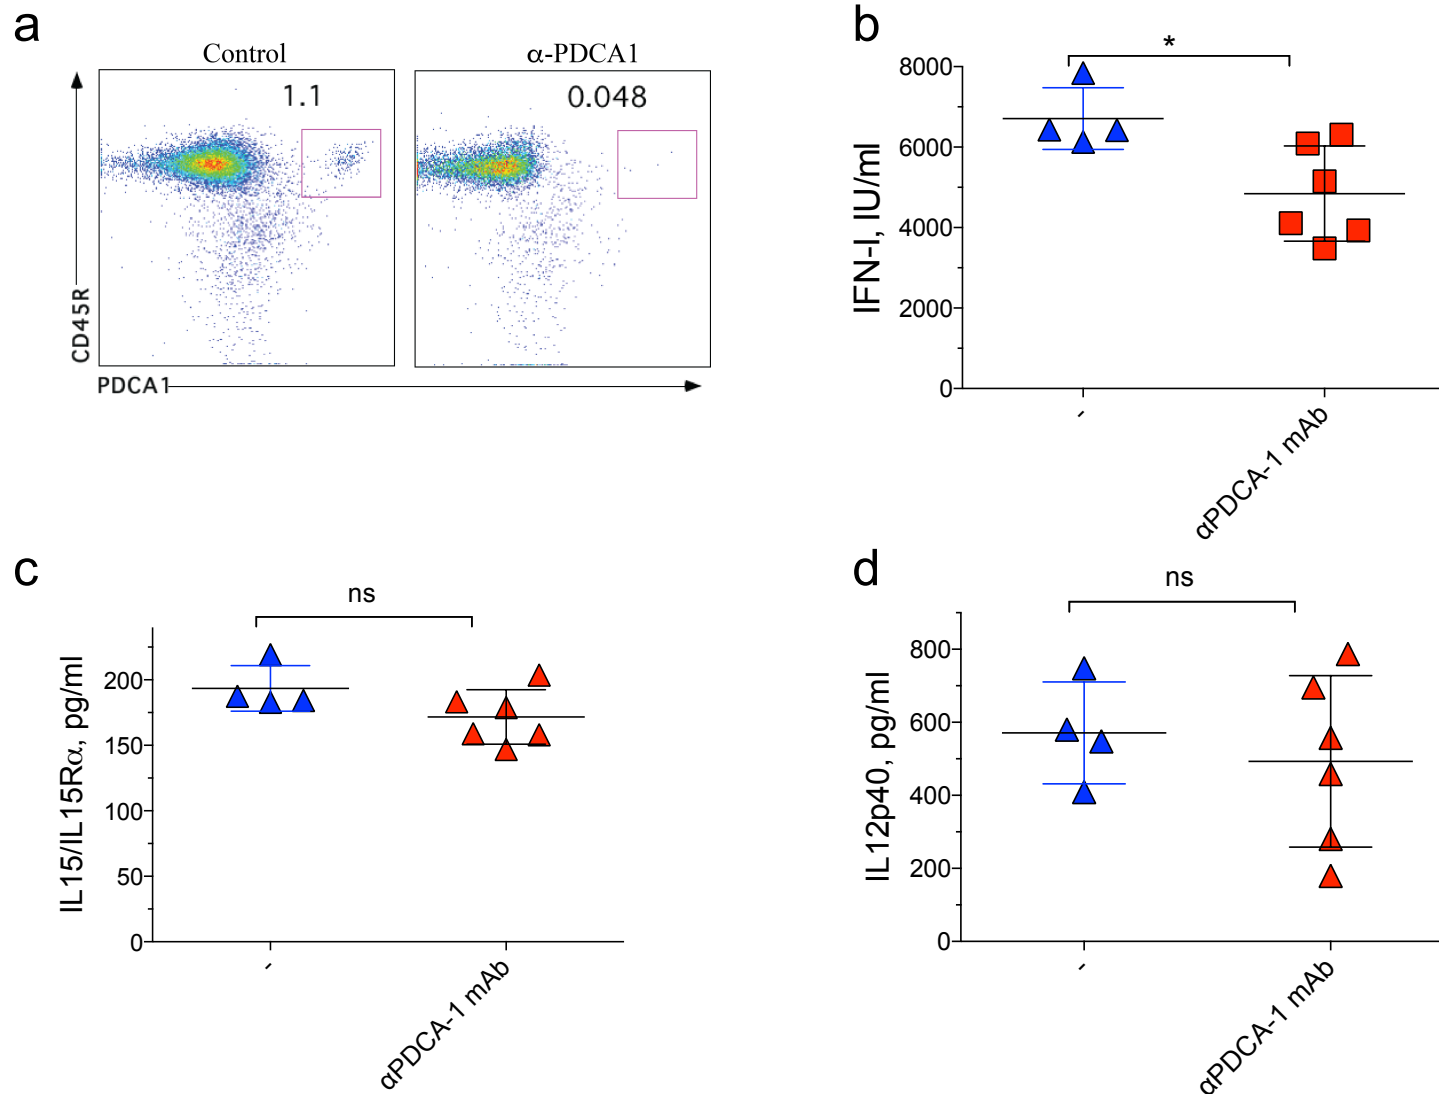

**Supplemental Fig. 5: Cytokine production by poly-ICLC can occur in the absence of plasmacytoid DCs (pDCs).** **a**, Percentages of pDCs (B220/CD45R<sup>+</sup>, PDCA-1<sup>+</sup>) in WT mice injected with 400  $\mu$ g of  $\alpha$ PDCA-1 mAb (clone BX444) or PBS, gated on the MHC-II<sup>+</sup> population and using a different  $\alpha$ PDCA-1 mAb (clone eBio927). **b-d**, Production of IFN-I, IL15/IL15R $\alpha$  complexes and IL12p40 in serum 18 h after poly-ICLC injection. Results are presented as individual mice (each symbol) with the mean  $\pm$  SD for each group.

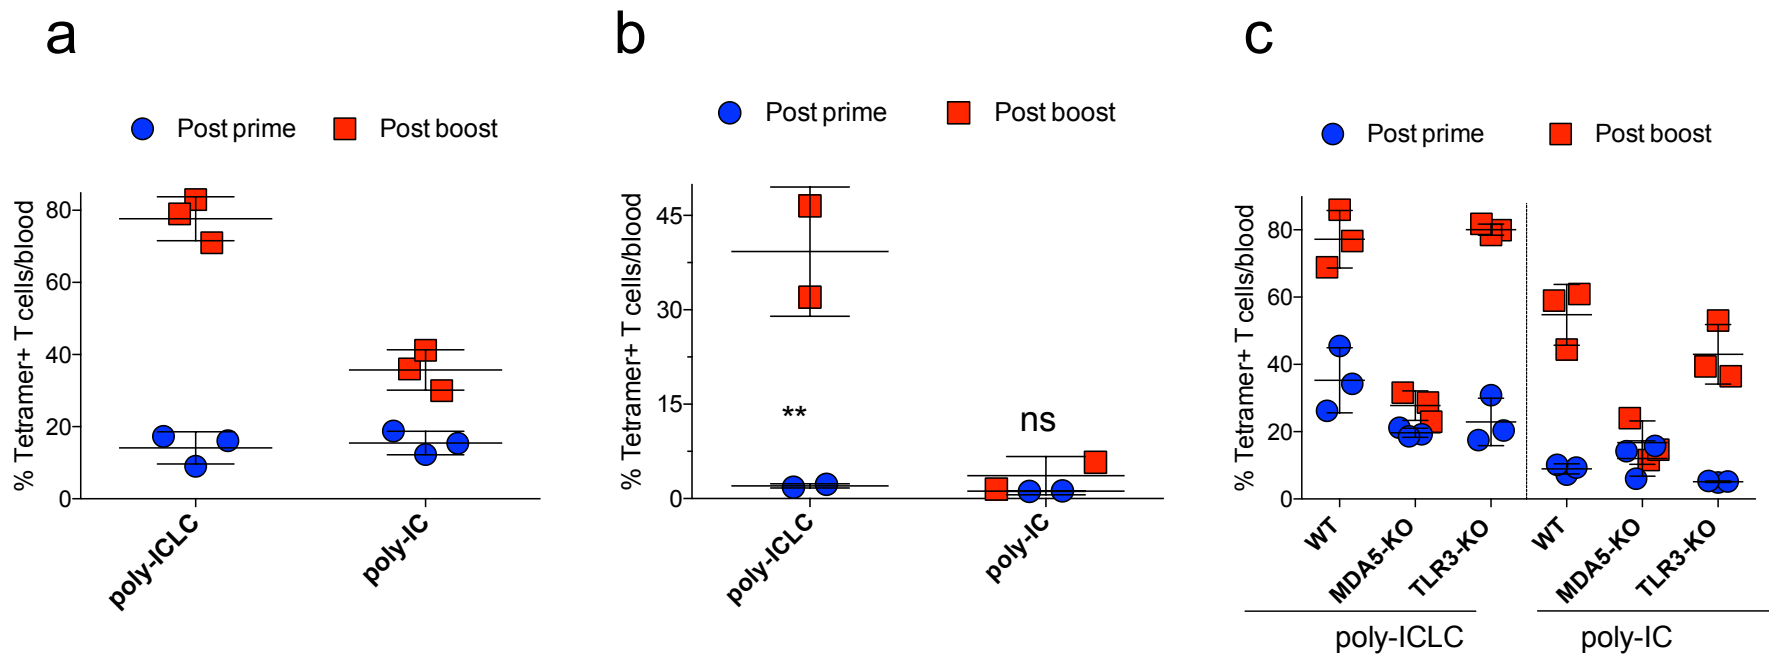

**Supplemental Fig. 6: Differences in poly-IC formulations affect CTL responses.** a-c, Percentages of tetramer+ CD8+ T cells (OT-I cells) among the total CD8 population in blood 7 days after the prime and boost of mice described in Fig. 3a-c (shown following the same order). Results are presented as individual mice (each symbol) with the mean  $\pm$  SD for each group.

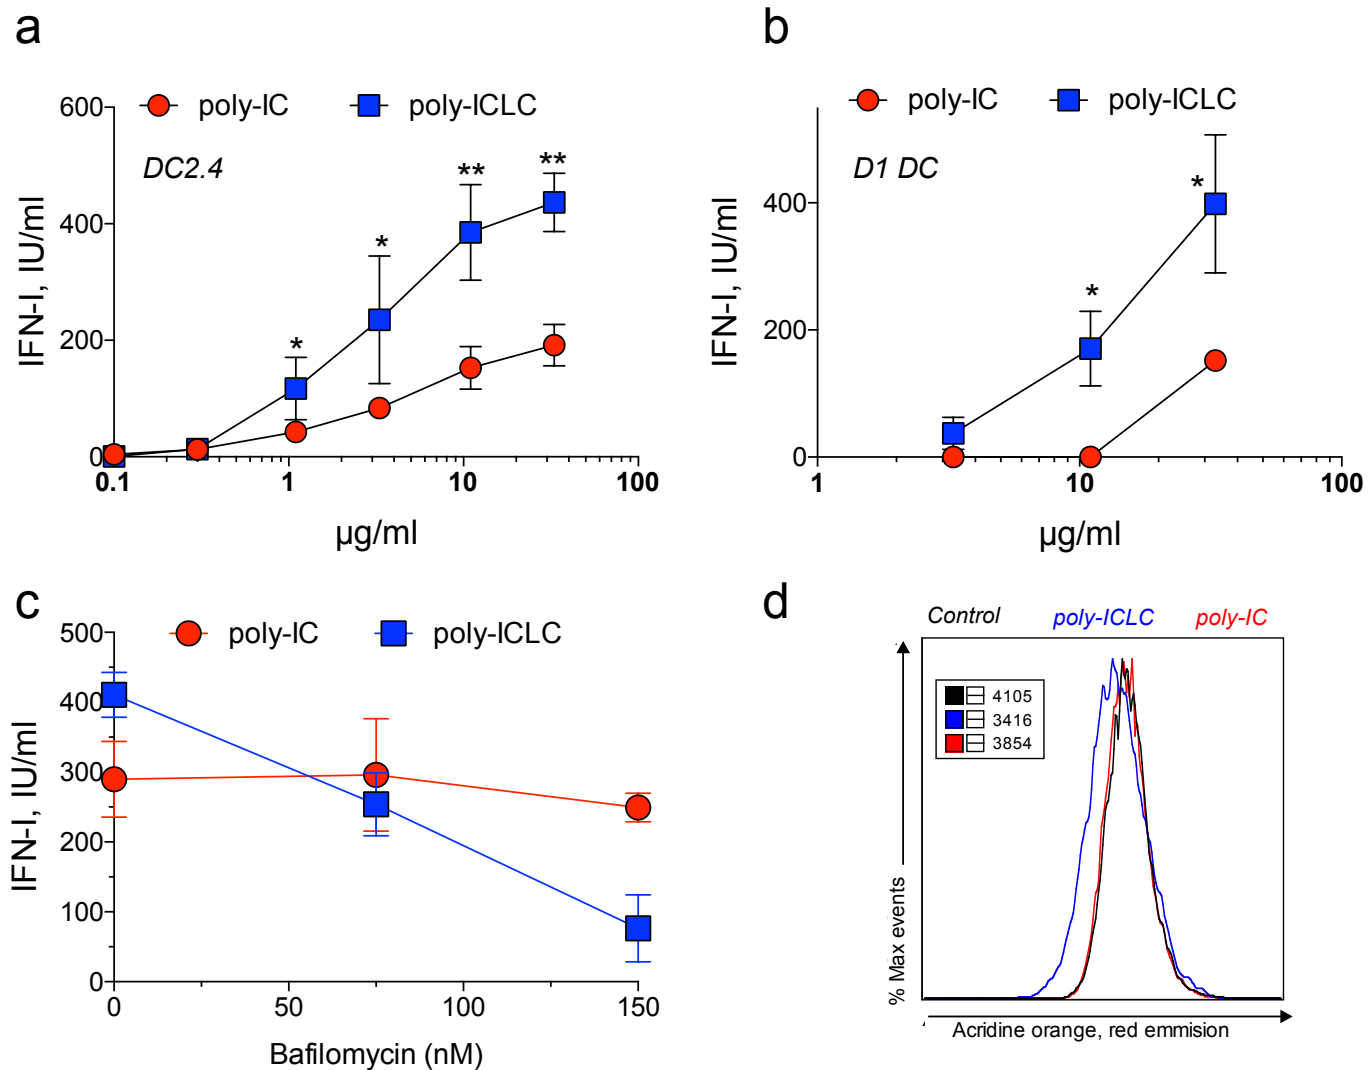

**Supplemental Fig. 7: Poly-ICLC stimulates MDA5 in DCs via the proton sponge effect.** **a-b**, Immortalized DC lines, DC2.4 and D1 DC were stimulated with serial dilutions of poly-IC or poly-ICLC and IFN-I production was evaluated 18 h later. **c**, The CD8 $\alpha$ DC cell line was incubated with bafilomycin A1 6 h before stimulation with poly-IC (100  $\mu$ g/ml) or poly-ICLC (25  $\mu$ g/ml) and the production of IFN-I was quantified. **d**, DC2.4 cells were stained with acridine orange, were incubated with 50  $\mu$ g poly-IC or poly-ICLC and the decrease of fluorescence emission at 600–650 nm reflecting endosomal escape (pH increase) was assessed 18 h later.

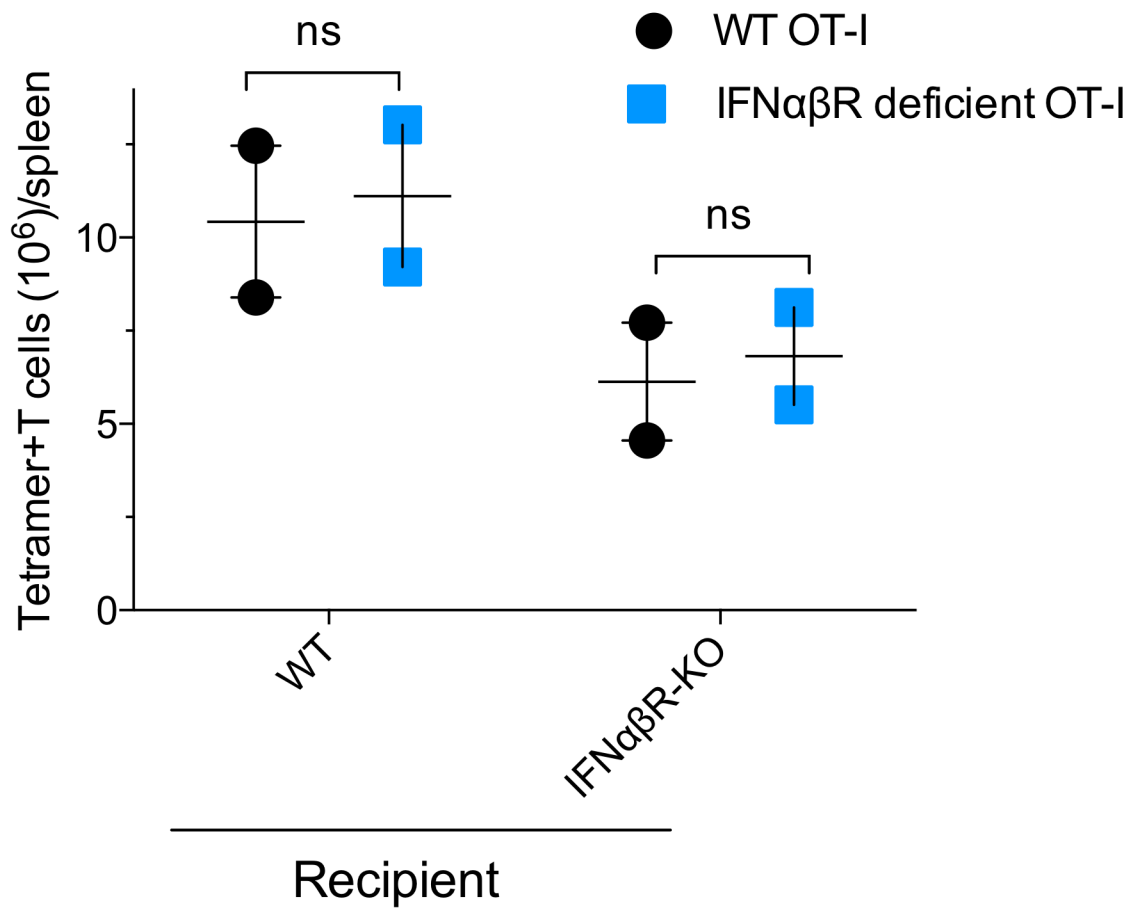

**Supplemental Fig. 8: Peptide + poly-ICLC vaccines are effective in expanding low numbers of T cells independently of their expression of IFNαβR.** WT and IFNαβR-KO mice received equal numbers (1000 each) of IFNαβR-KO OT-I cells (CD45.1+/CD45.2+) and WT OT-I cells (CD45.1+/CD45.2-) followed by pam-Ova + poly-ICLC prime-boost vaccination administered 14 days apart and numbers of the OT-I populations in spleens obtained 7 days after the boost are shown.



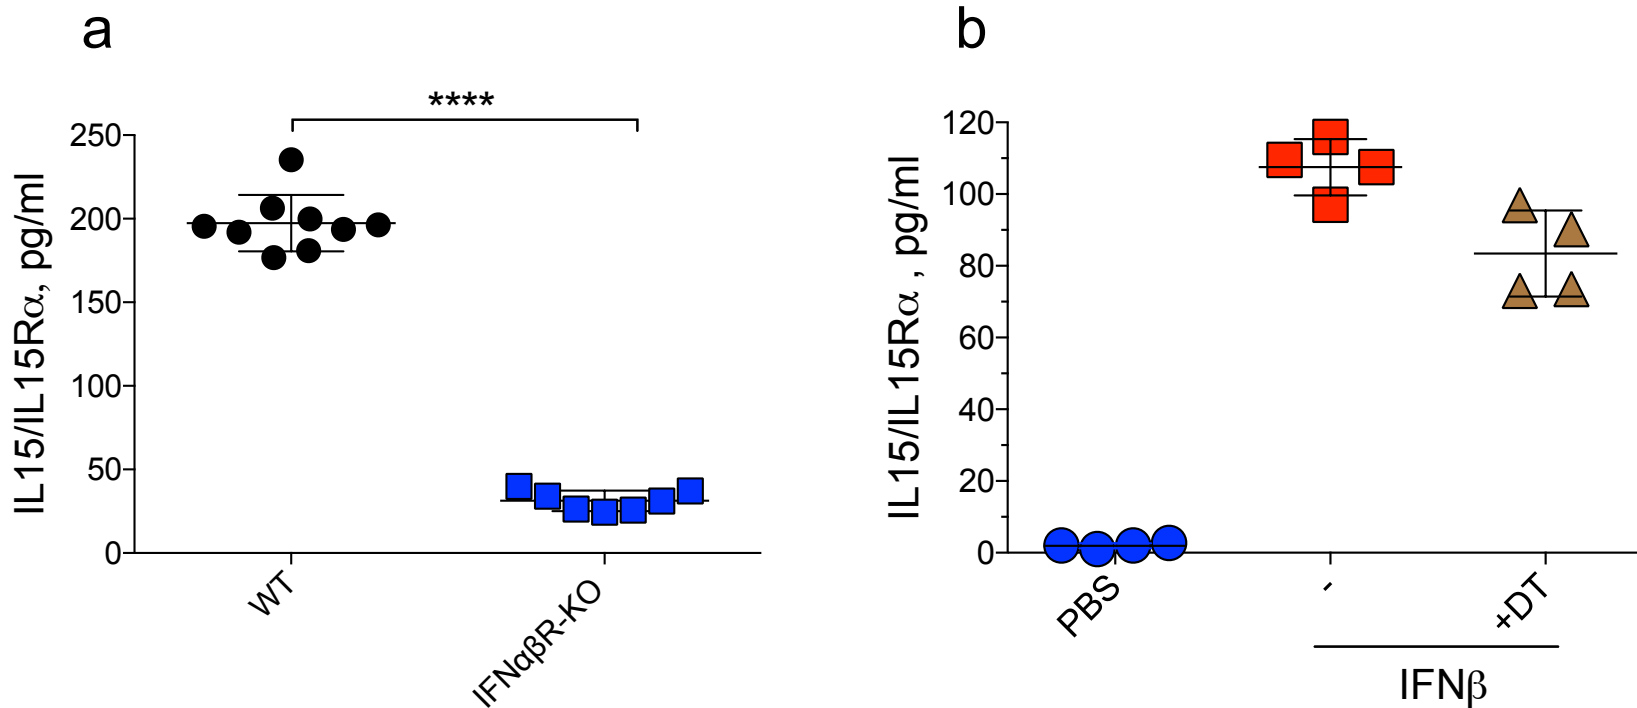

**Supplemental Fig. 9: Poly-ICLC and IFN-I can generate IL15 in vivo.** **a**, WT or IFN $\alpha\beta$ R-KO mice were injected (i.v.) with 50  $\mu$ g poly-ICLC and 18 h later the production of IL15/IL15R $\alpha$  complexes was measured in serum. **b**, CD11cDTR chimeric mice were depleted (or not) of DCs by 2 sequential DT injections (2 days apart) followed by 2 doses of IFN- $\beta$  (10,000 IU/mouse, 12 h apart) and 6 h later levels of soluble IL15/IL15R $\alpha$  complexes in sera were measured. Control mice injected with PBS instead of IFN- $\beta$  were also DC depleted.

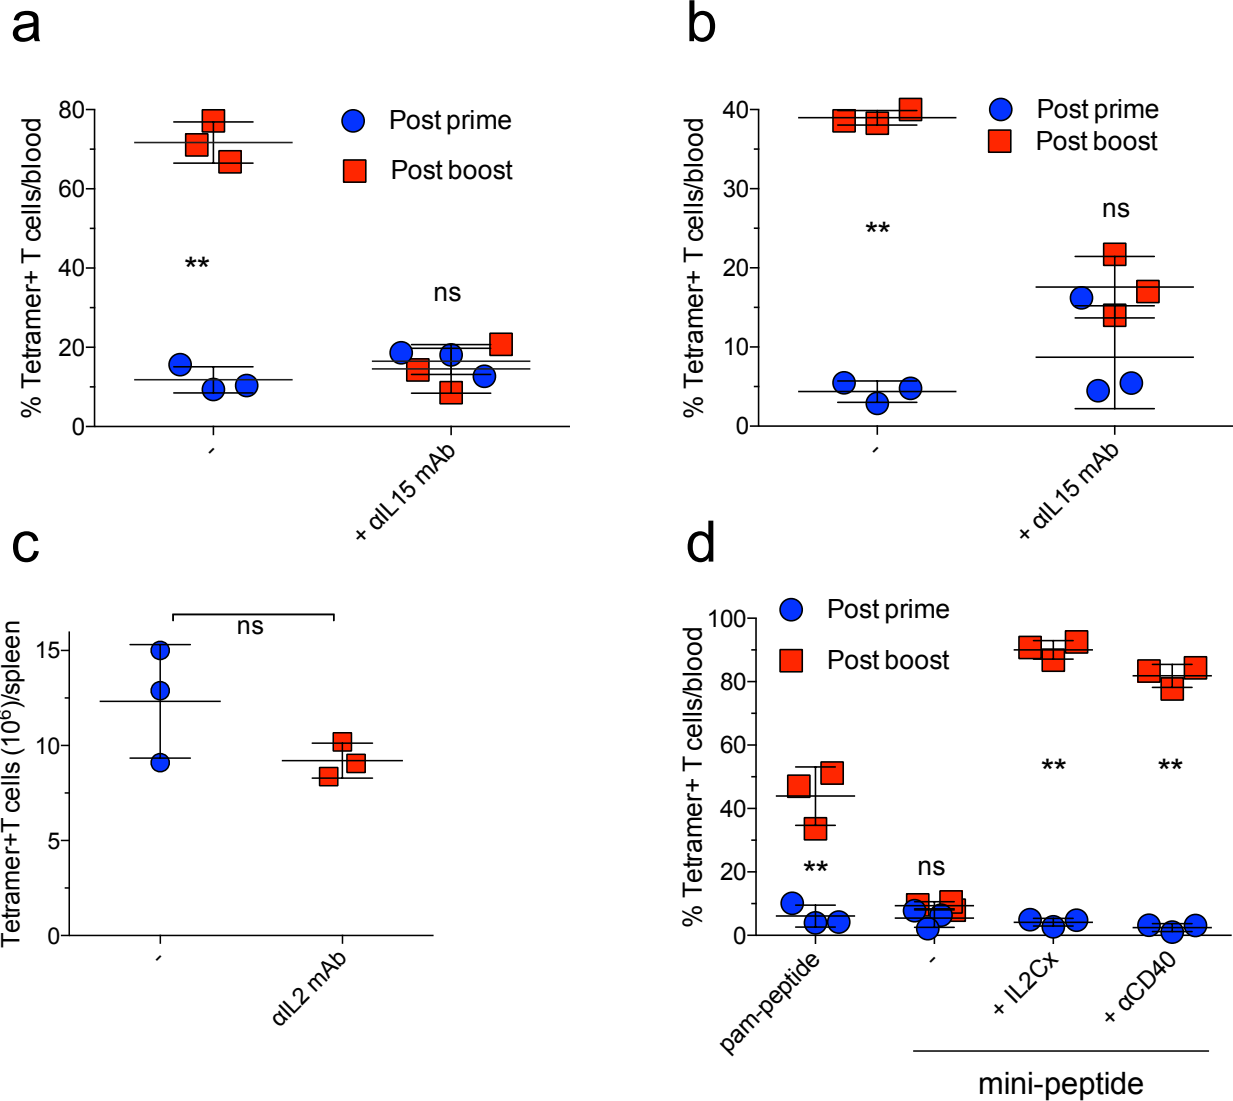

**Supplemental Fig. 10: IFN-I signaling leads to IL15 production enabling CTL expansion.** **a-b**, Percentage of tetramer+ CD8+ T cells (OT-I cells) among the total CD8 population in blood 7 days after prime and boost of the mice described in **Fig. 6c-d** (shown following the same order). **c**, WT mice received  $10^5$  naïve OT-I cells followed by 2 doses of pam-Ova + poly-ICLC vaccine administered 14 days apart. Some mice received  $300 \mu\text{g}$   $\alpha\text{IL2}$  mAb (JES6-5H4) on days 14, 16 and 18 and the numbers of OT-I cells in spleens were evaluated. **d**, Percentages of tetramer+ CD8+ T cells (OT-I cells) among the total CD8 population in blood after prime and boost of mice described in **Fig. 6f**. Results are presented as individual mice (each symbol) with the mean  $\pm$  SD for each group.

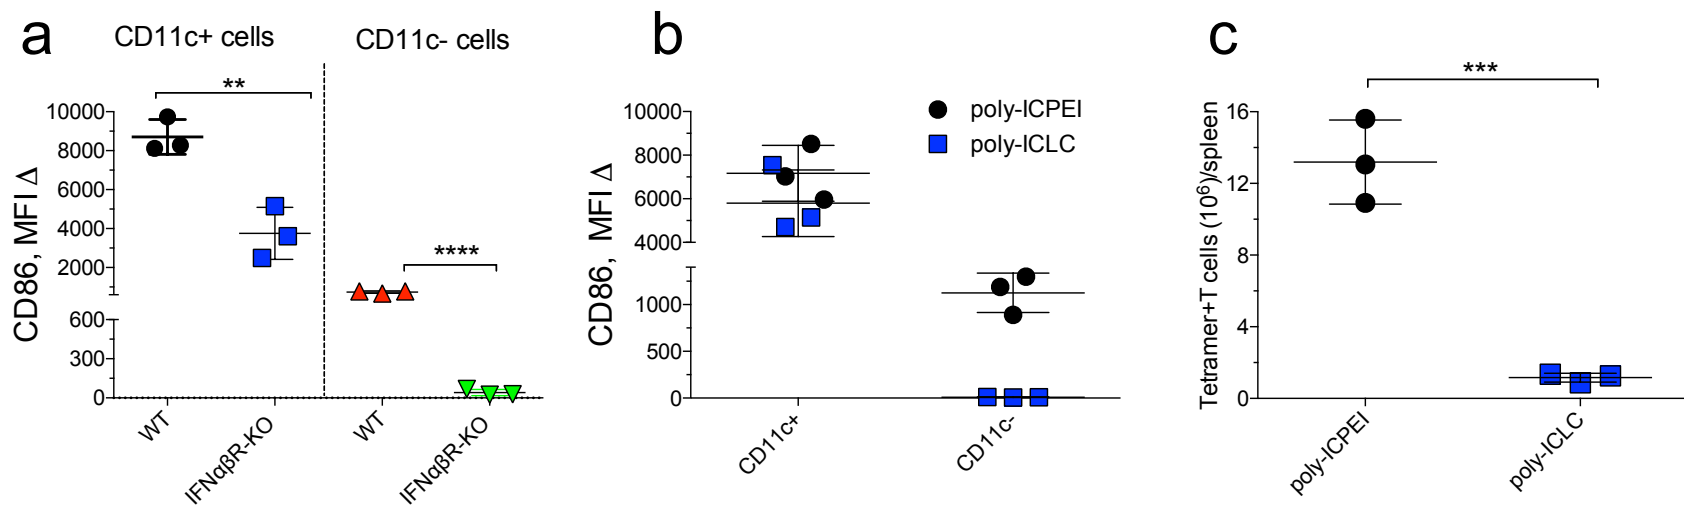

**Supplemental Fig. 11: Upregulation of CD86 expression in npAPCs may support T cell expansion in the absence of IFN-I signaling.** **a**, WT or IFN $\alpha\beta$ R-KO mice were injected (i.v.) with 50  $\mu$ g poly-ICLC and 18 h later the levels of CD86 were evaluated in CD11c+/MHC-II+ and CD11c-/MHC-II+ spleen cells. **b**, IFN $\alpha\beta$ R-KO mice were injected (i.v.) with 50  $\mu$ g poly-ICPEI or poly-ICLC and 18 h later the levels of CD86 expression in CD11c+/MHC-II+ and CD11c-/MHC-II+ spleen cells were measured. **c**, IFN $\alpha\beta$ R-KO hosts received  $10^5$  naïve IFN $\alpha\beta$ R-KO OT-I cells and a pam-Ova + poly-ICLC vaccine prime followed 14 days later with boosts with either mini-Ova + poly-ICLC or mini-Ova + poly-ICPEI. The number of OT-I cells in spleens was evaluated 7 days after the boost. Results for **a-b** are presented as the increase of mean fluorescence intensity (MFI  $\Delta$ ) of CD86 surface expression in individual mice (each symbol) with the mean  $\pm$  SD for each group, and for **c**, numbers of tetramer+ OT-I T cells per spleen in individual mice (with the mean  $\pm$  SD).

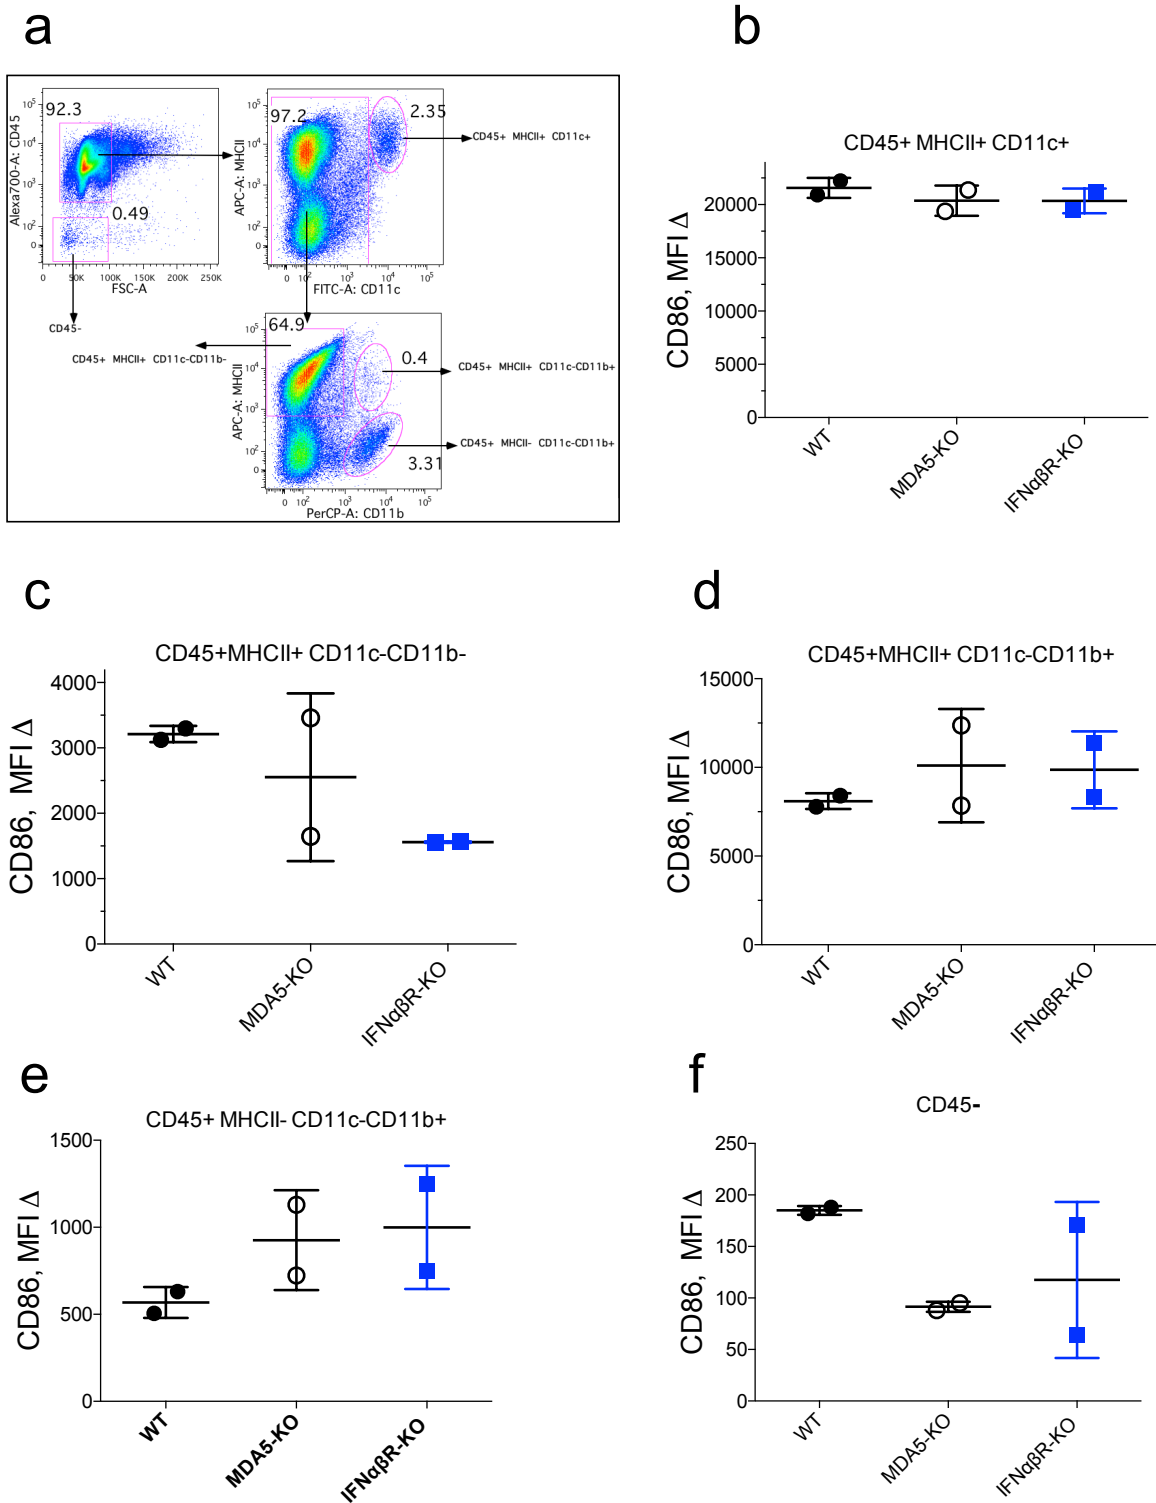

**Supplemental Fig. 12: Anti-CD40 mAb treatment upregulates CD86 expression.** a-f, WT, MDA5 or IFN $\alpha\beta$ R-KO mice were injected with 100  $\mu$ g  $\alpha$ CD40 mAb and 18 h later, CD86 expression was assessed in different spleen cell subsets based on the gating strategy described in a. Results are presented for individual mice (each symbol) with the mean  $\pm$  SD for each group.
